# Supplementary material for: Translating SOD1 Gene Silencing toward the Clinic: A Highly Efficacious, Off-Target-free, and Biomarker-Supported Strategy for fALS
Source: PubMed Central journal article supplement — Mol Ther Nucleic Acids. 2018 May 3;12:75–88. doi: 10.1016/j.omtn.2018.04.015 (PMC6023790; doi:10.1016/j.omtn.2018.04.015), 2018-05-03

## **Supplemental Information**

### **Translating SOD1 Gene Silencing toward the Clinic: A Highly Efficacious, Off-Target-free, and Biomarker-Supported Strategy for fALS**

**Tommaso Iannitti, Joseph M. Scarrott, Shibi Likhite, Ian R.P. Coldicott, Katherine E. Lewis, Paul R. Heath, Adrian Higginbottom, Monika A. Myszczyńska, Marta Milo, Guillaume M. Hautbergue, Kathrin Meyer, Brian K. Kaspar, Laura Ferraiuolo, Pamela J. Shaw, and Mimoun Azzouz**

## Supplementary Materials

**Supplementary Table 1** – Therapeutic and off-target control shRNA construct oligonucleotide sequences. 3bp mismatch between scAAV9\_hSOD1si and scAAV9\_misSOD1si highlighted in red.

| Construct          | Sequence 5' - 3'                                                   |
|--------------------|--------------------------------------------------------------------|
| scAAV9_hSOD1si.F   | AGCTTTCAAAAAAGCATGGATTCCATGTTTCATGATCTCTGAATCATGAACATGGAATCCATG    |
| scAAV9_hSOD1si.R   | GATCCATGGATTCCATGTTTCATGATTCAGAGATCATGAACATGGAATCCATGCTTTTTTGGAA   |
| scAAV9_misSOD1si.F | AGCTTTCAAAAAAGCATGGATTGGTGTTCATGATCTCTGAATCATGAACAACCAATCCATG      |
| scAAV9_misSOD1si.R | GATCCATGGATTGGTGTTCATGATTCAGAGATCATGAACAACCAATCCATGCTTTTTTGGAA     |
| scAAV9_hSOD1si_2.F | AGCTTTCAAAAAAGCATTAAAGGACTGACTGATCTCTGAATCAGTCAGTCCTTTAATGCG       |
| scAAV9_hSOD1si_2.R | GATCCGCATTAAAGGACTGACTGATTCAGAGATCAGTCAGTCCTTTAATGCTTTTTTGGAA      |
| scAAV9_H1emp.F     | AGCTTATCTAGGTGAAGATCCTTTTTGATAATCTCATGACCAAAATCCCTTAACGTGAGTTTTG   |
| scAAV9_H1emp.R     | GATCCAAAACCTCACGTTAAGGGATTTTGGTCATGAGATTATCAAAAAGGATCTTCACCTAGATA  |
| scAAV_hSOD1ssi.F   | CGCGTCCCCGTAGCACCGGTAAGATTAATCAAGAGATTAATCTTACCGGTGCTACTTTTTGGAAAT |
| scAAV_hSOD1ssi.R   | CGATTTCCAAAAAGTAGCACCGGTAAGATTAATCTCTGAATTAATCTTACCGGTGCTACGGGA    |

**Supplementary Figure 1** – Principal component analysis of scAAV9 transduced iAstrocyte cells, coloured by treatment. (Blue: scAAV9\_hSOD1si, Yellow: scAAV9\_hSOD1si\_2, Pink: scAAV9\_misSOD1si, White: scAAV9\_H1emp)

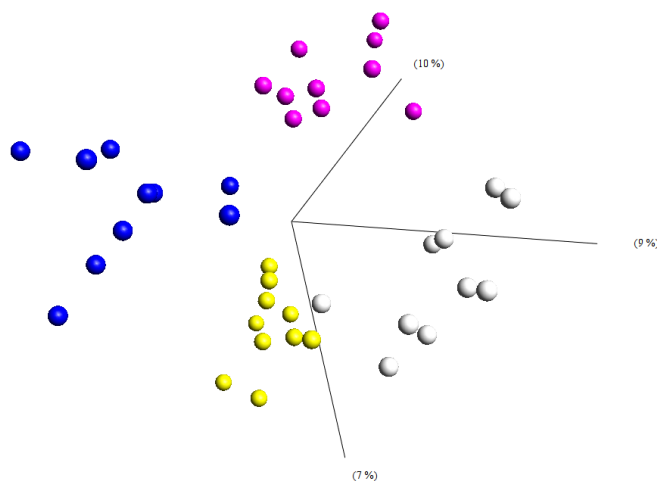

**Supplementary Figure 2** - hSOD1 mRNA knockdown by scAAV9\_hSOD1si transduction across different iAstrocyte cell lines. Graphs show hSOD1 mRNA level fold change as determined by RT-qPCR in iAstrocyte cells transduced with 250,000vg/cell scAAV9\_hSOD1si viral vector, harvested 5 days post-transduction. Sporadic = sporadic ALS cases; Familial = SOD1-fALS cases.

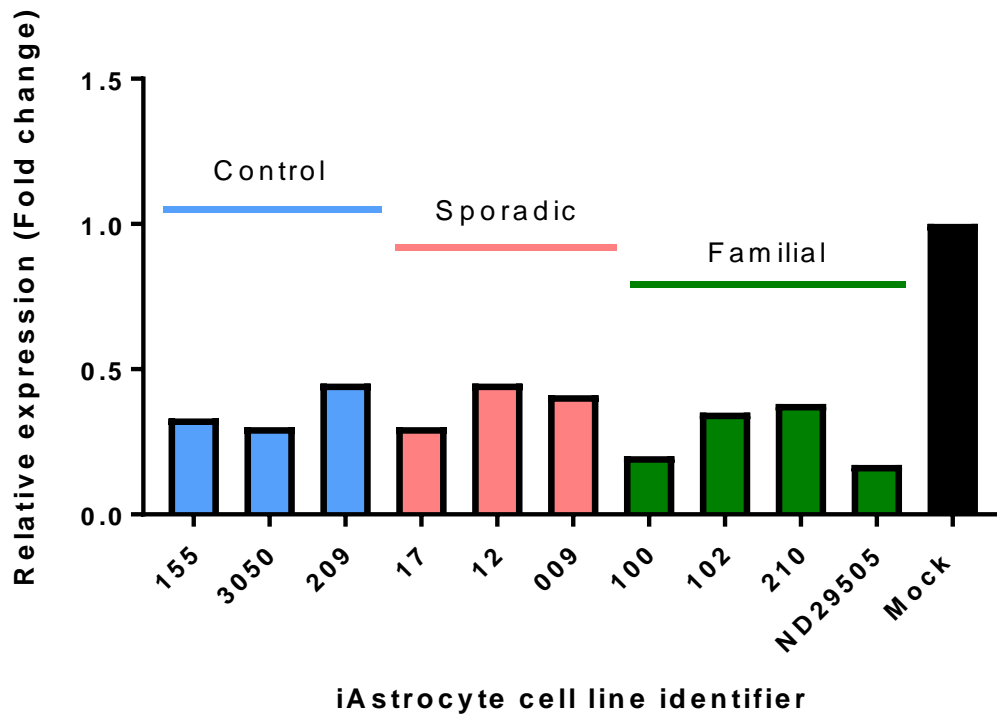

Supplement: mmc1.pdf [file mmc1.pdf]
